# Supplementary material for: GDE2-Dependent Activation of Canonical Wnt Signaling in Neurons Regulates Oligodendrocyte Maturation
Source: PubMed Central journal article supplement — Cell Rep. Author manuscript; Available in PMC 2020 May 28. (PMC7254694; doi:10.1016/j.celrep.2020.107540), 2020-05-05
Supplement: NIHMS1591485-supplement-1.pdf [file NIHMS1591485-supplement-1.pdf]

**Cell Reports, Volume 31**

**Supplemental Information**

**GDE2-Dependent Activation  
of Canonical Wnt Signaling in Neurons  
Regulates Oligodendrocyte Maturation**

**Bo-Ran Choi, Clinton Cave, Chan Hyun Na, and Shanthini Sockanathan**

**Figure S1**

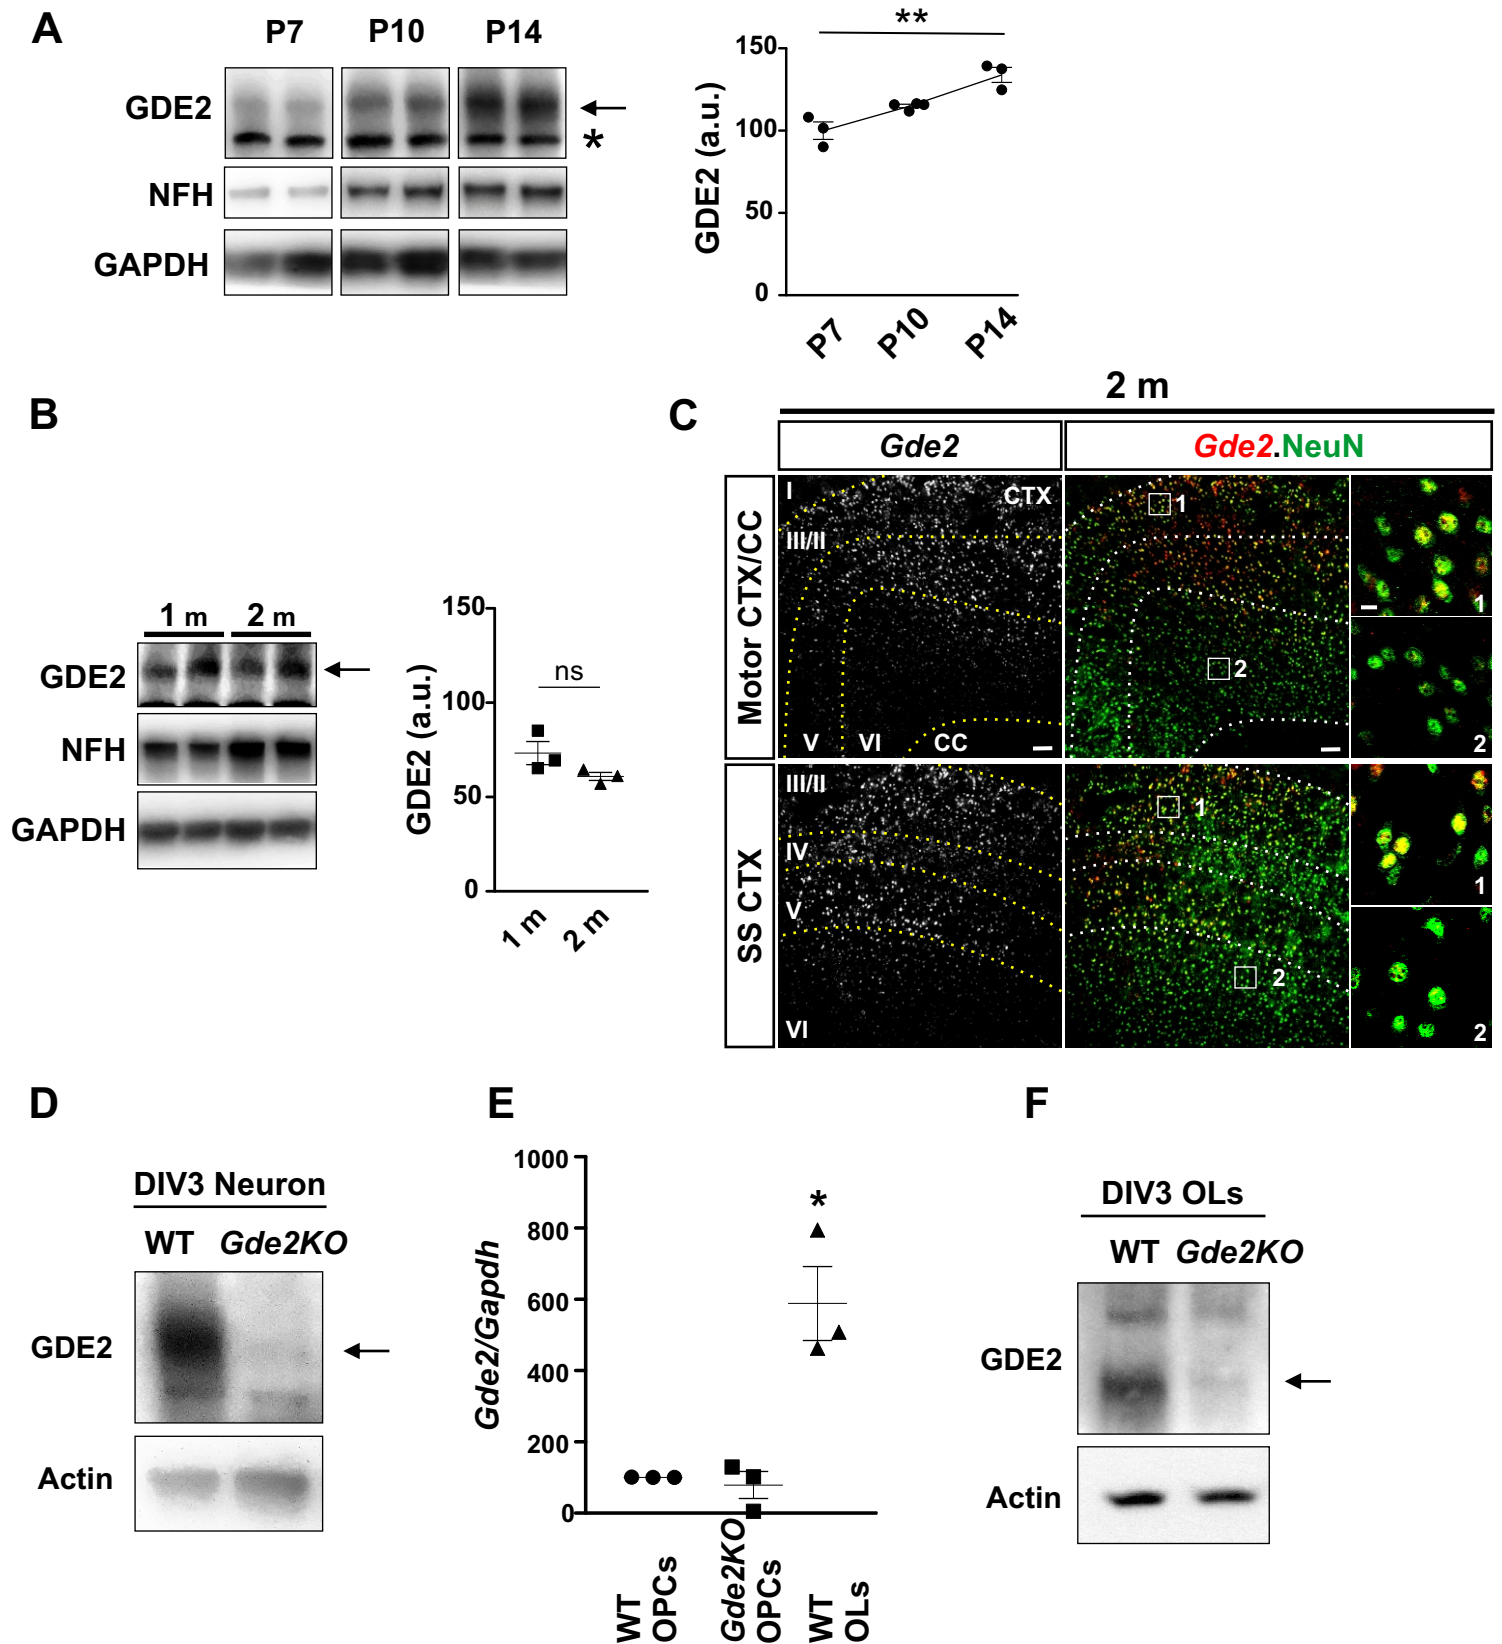

**Figure S1. Related to Figure 1. GDE2 is expressed in neurons and OLs.**

(A) Western blot of cortical extracts from WT animals at postnatal day 7 (P7), P10 and P14. GAPDH is a loading control, NFH is expressed in axons and provides a readout of neurons in brain tissue. Arrow indicates GDE2. Asterisk indicates a nonspecific band. Graph quantifying Western data from P7-P14. a.u. = arbitrary units.  $**p = 0.0013$ .  $n = 3$  P7, 4 P10, 3 P14, 1-way ANOVA. (B) Western blot and quantification of GDE2 protein expression at 1 and 2 months (m) of age. ns  $p = 0.182$ .  $n = 3$  for each timepoint, two-tailed unpaired t-test. (C) Cortical coronal sections showing *Gde2* transcript distribution. CC: corpus callosum, SS: somatosensory cortex. Cortical layers are marked by dotted lines. Boxed areas 1 and 2 are magnified in right panels. Scale bar: 100  $\mu\text{m}$ , insets 10  $\mu\text{m}$  (D) Western blot of DIV3 cortical neuronal cultures. Arrow marks GDE2. Actin is a loading control. (E) qPCR of *Gde2* transcripts normalized to *Gapdh* mRNA.  $*p = 0.0021$ .  $n = 3$  sets of WT, *Gde2*KO OPCs, and WT OLs, 1-way ANOVA. (F) Western blot shows GDE2 is expressed in WT OLs (marked by arrow). Actin is a loading control. All graphs: Mean  $\pm$  sem.

Figure S2

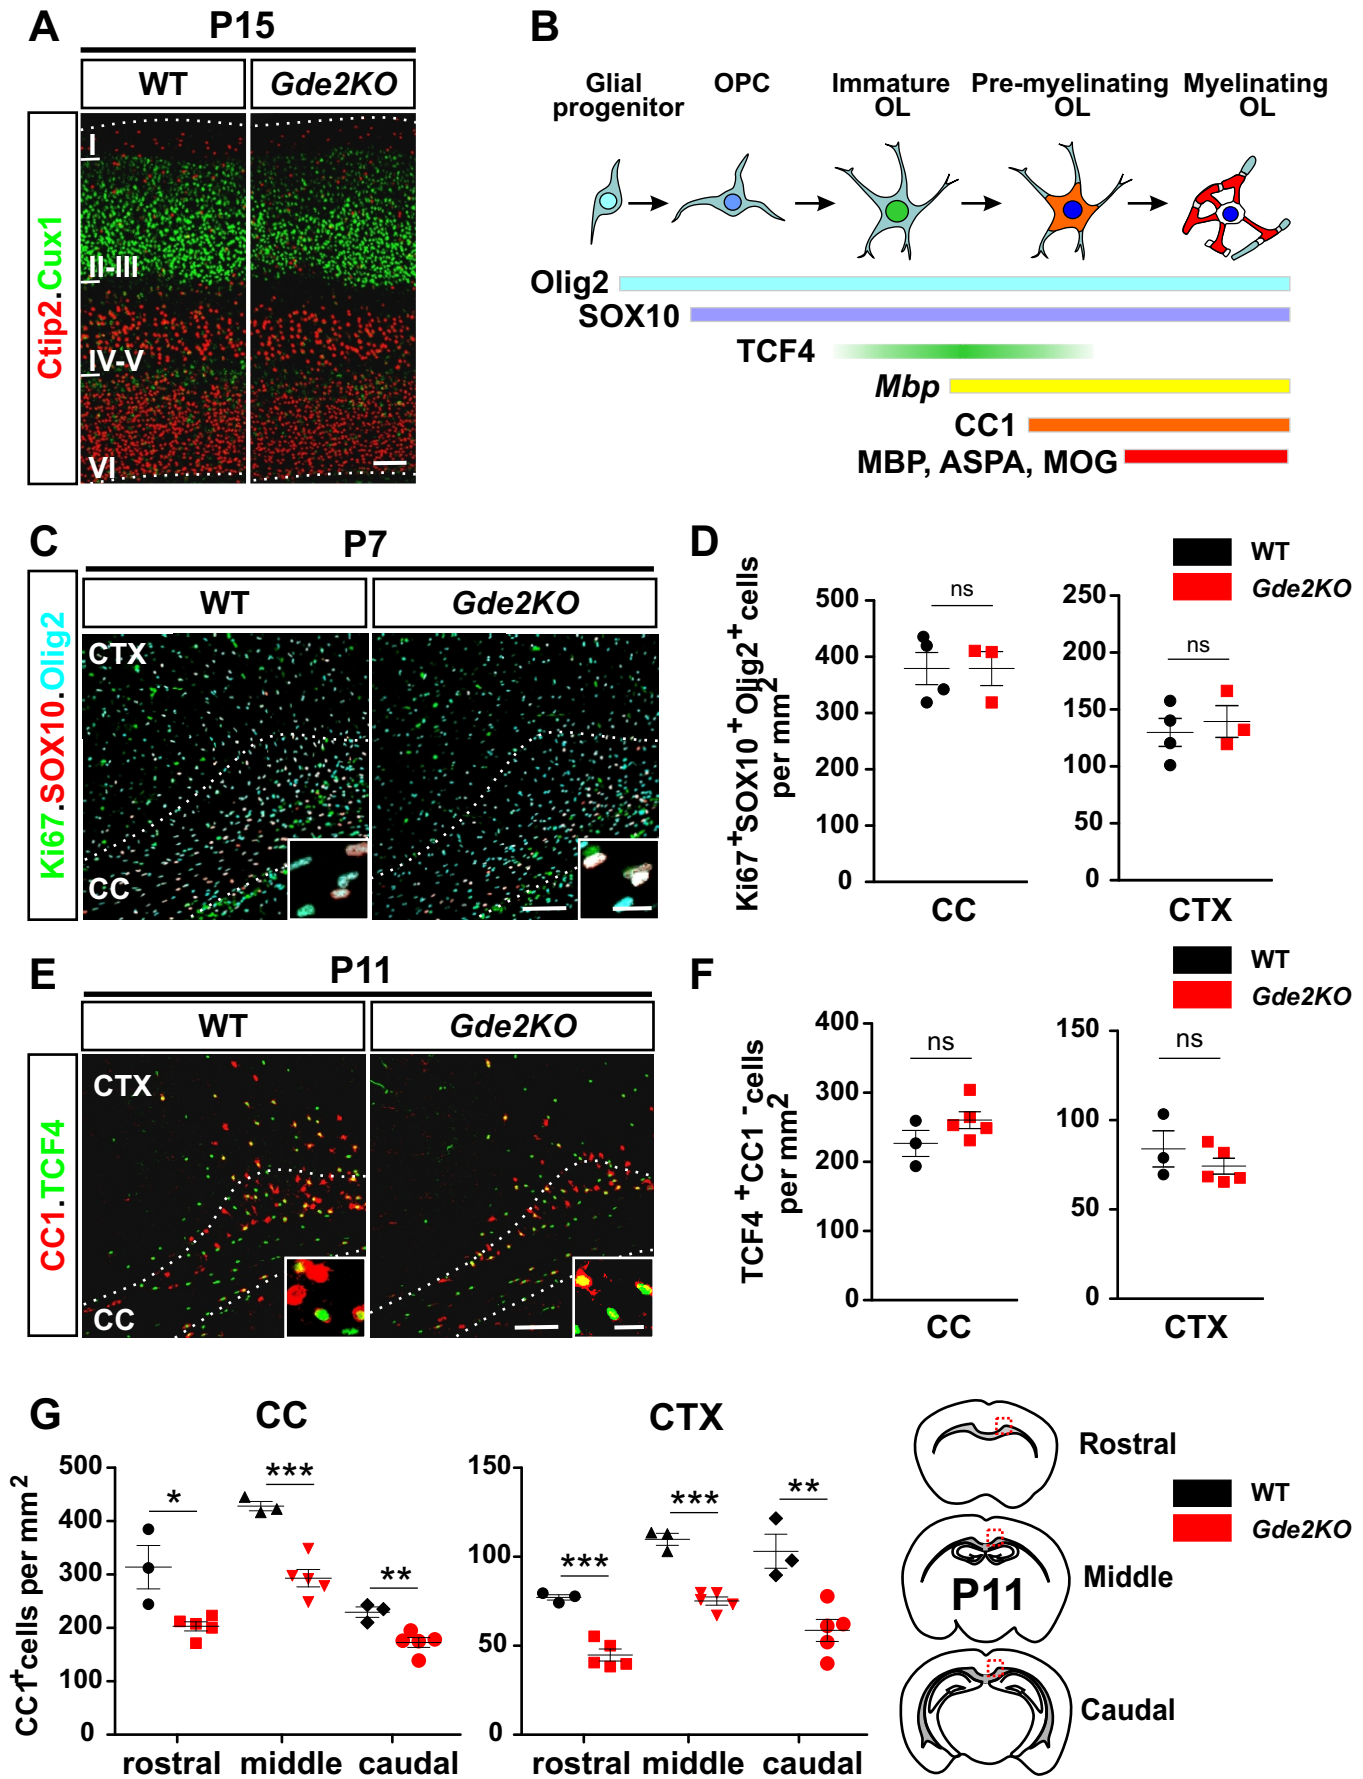

**Figure S2. Related to Figure 2. GDE2 loss impairs OL maturation.**

(A) Coronal section of P15 mouse cortex, hatched lines mark cortical boundaries. Cortical layers I-VI are marked. (B) Schematic showing the progression of OL maturation coincident with marker expression. (C) Coronal section of P7 mouse cortex (CTX) and corpus callosum (CC). Hatched line marks boundary between CTX and CC. Inset box shows magnified image of proliferating OPCs (white, Ki67+Sox10+Olig2+). (D) Graphs quantifying the number of proliferating OPCs (Ki67+Sox10+Olig2+) CC ns  $p = 0.9981$  and CTX ns  $p = 0.6352$ ,  $n = 4$  WT, 3 *Gde2KO*. Two tailed unpaired Student's t-test. (E) Coronal section of P11 mouse CTX and CC. Hatched line demarcates the CC. Inset box shows magnified image of immature (TCF4+CC1-) and mature OLs (CC1+). (F) Graphs quantifying the number of immature OLs (TCF4+CC1-). CC ns  $p = 0.2306$  and CTX ns  $p = 0.8021$ ,  $n = 3$  WT, 5 *Gde2KO*. Two tailed unpaired Student's t-test. (G) Graphs quantifying number of CC1+ cells in boxed areas in rostral, middle and caudal regions of mouse P11 CC and CTX as shown in schematic. Data for middle regions are the same as in Figure 2B and are reproduced here for comparison purposes. CC: \* $p$  rostral = 0.013 \*\*\* $p$  middle = 0.0007 \*\* $p$  caudal = 0.0072; CTX: \* $p$  rostral = 0.0004 \*\*\* $p$  middle = 0.0035 \*\* $p$  caudal = 0.0063.  $n = 3$  WT 5 *Gde2KO*. Two tailed unpaired Student's t-test. All graphs: Mean  $\pm$  sem. Scale bars: (A, C, E) 100  $\mu$ m, insets (C, E) 5  $\mu$ m.

Figure S3

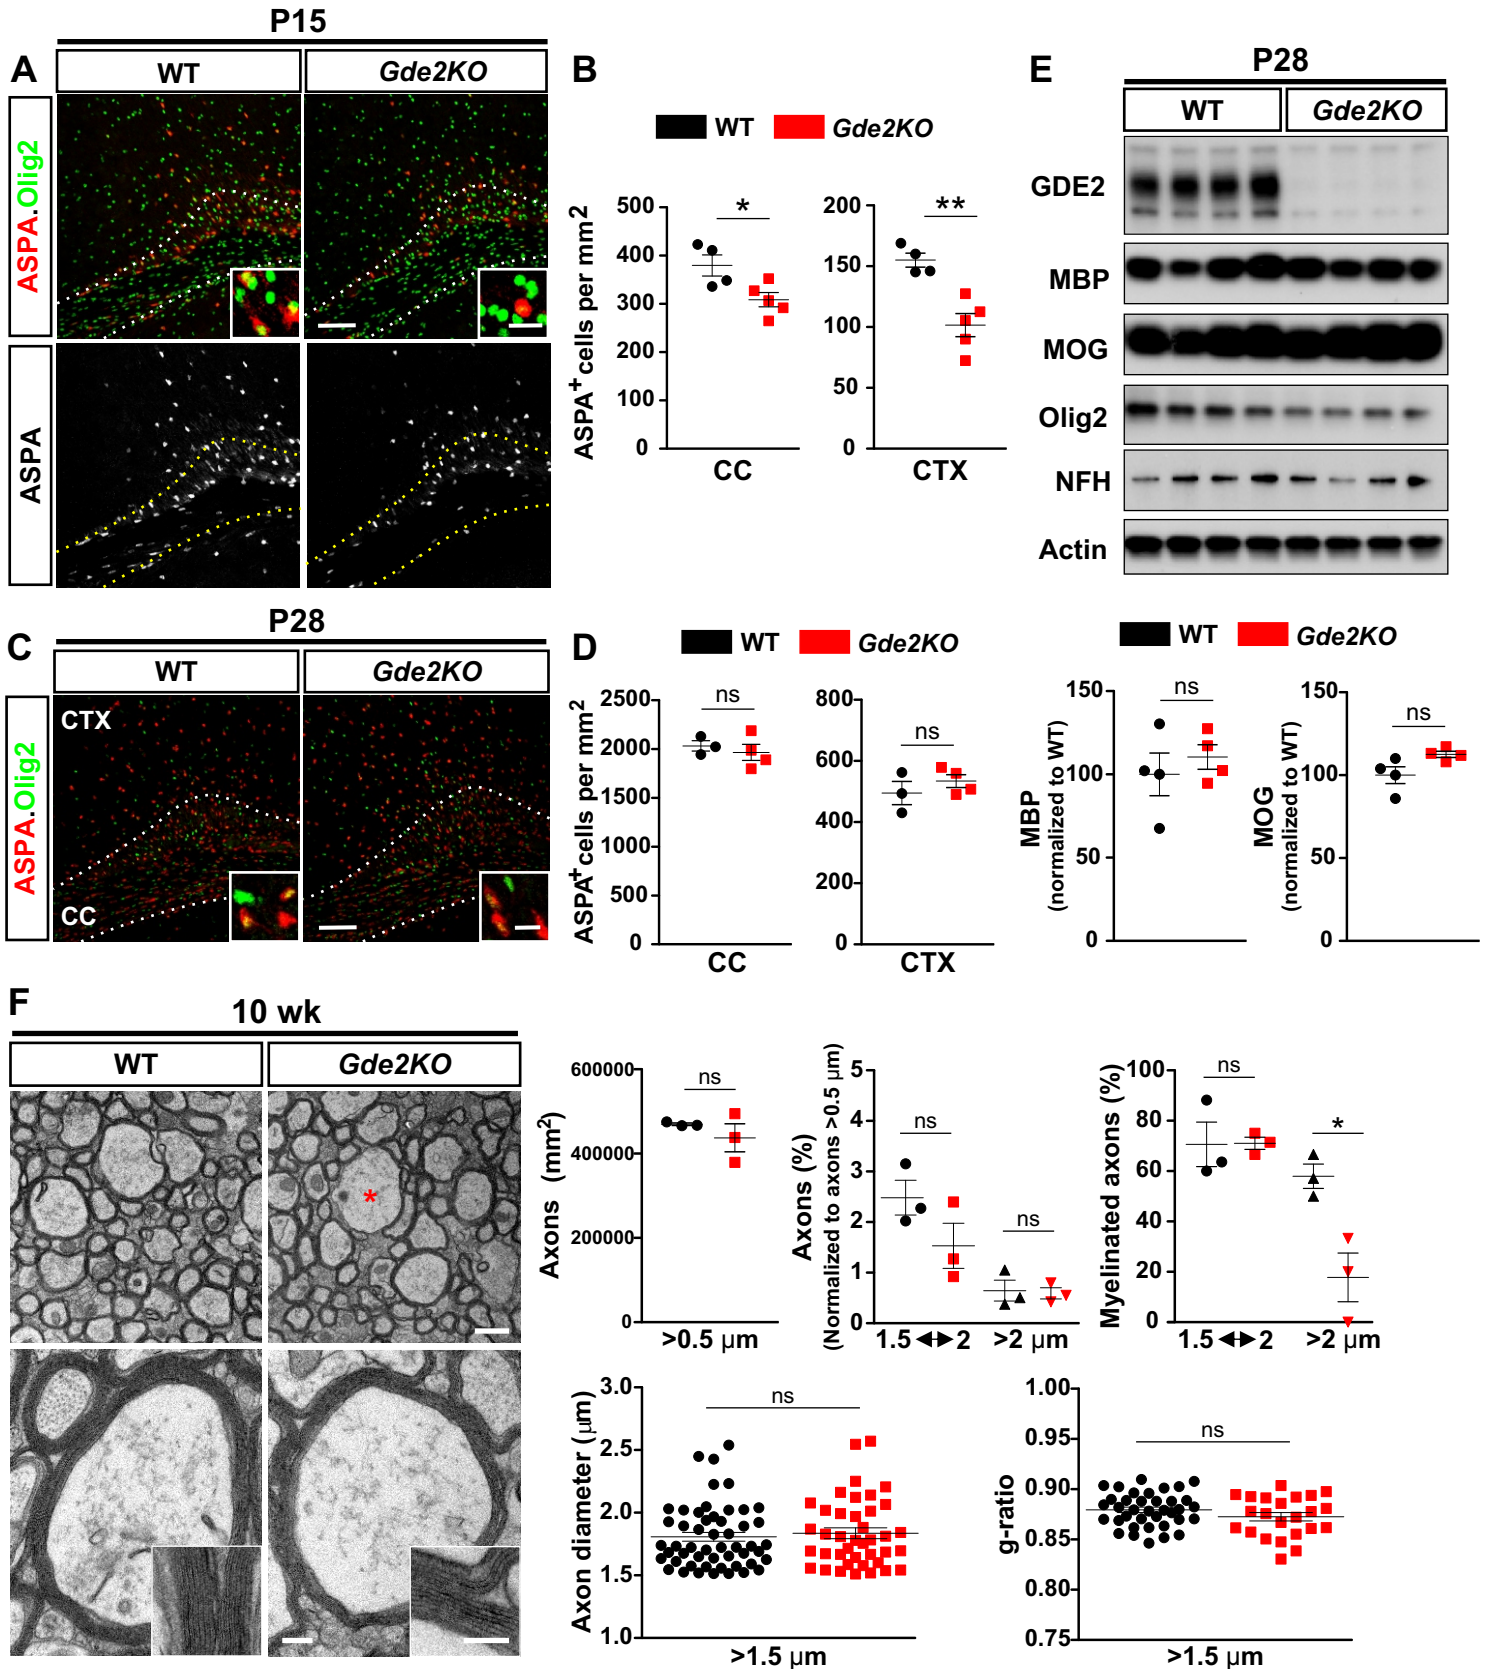

**Figure S3. Related to Figure 2. *Gde2* KOs show recovery of myelin protein but have decreased myelination of large-diameter axons.**

(A, C) Coronal sections of mouse cortex (CTX) and corpus callosum (CC). Hatched lines delineate the CC. Insets show high magnification of mature OLs. Scale bars: 100  $\mu\text{m}$  insets: 10  $\mu\text{m}$  in A and C. (B, D) Graphs quantifying numbers of ASPA+ OLs in CC and CTX. (B) CC \* $p = 0.0275$  and CTX \*\* $p = 0.0028$ ,  $n = 4$  WT, 5 *Gde2*KO (D) CC ns  $p = 0.539$  and CTX ns  $p = 0.4373$ ,  $n = 3$  WT, 4 *Gde2*KO. (E) Western blot of cortical extracts from P28 animals. Graphs quantifying myelin associated proteins MBP ns  $p = 0.5198$ , MOG ns  $p = 0.1035$   $n = 4$  WT, 4 *Gde2*KO. (F) Representative TEM images of 10 week WT and *Gde2*KO animals. \* marks exemplar unmyelinated larger-diameter axon in *Gde2*KO condition. Scale bar: (Top) 1  $\mu\text{m}$ , (Bottom) 200 nm, Inset 100 nm. Graphs quantifying axon numbers (ns  $p = 0.3905$ ) and the percentage of axons with diameters between 1.5 and 2 $\mu\text{m}$  (ns  $p = 0.1649$ ) and larger than 2 $\mu\text{m}$  (ns  $p = 0.8323$ ). Although the percentage of myelinated axons between 1.5 and 2 $\mu\text{m}$  is equivalent between WT and *Gde2*KO animals (ns  $p = 0.9667$ ), the percentage of myelinated axons with diameters larger than 2 $\mu\text{m}$  is dramatically reduced (\* $p = 0.0206$ )  $n = 3$  WT, 3 *Gde2*KO. Diameters of axons greater than 0.5 $\mu\text{m}$  (ns  $p = 0.5977$ ) and g-ratios of myelinated axons with diameters larger than 1.5 $\mu\text{m}$  are unchanged between WT and *Gde2*KO animals (ns  $p = 0.156$ ). Each point refers to individual myelinated axons from 3 WT and 3 *Gde2*KO. All graphs Mean  $\pm$  sem, two tailed unpaired t-test.

**Figure S4**

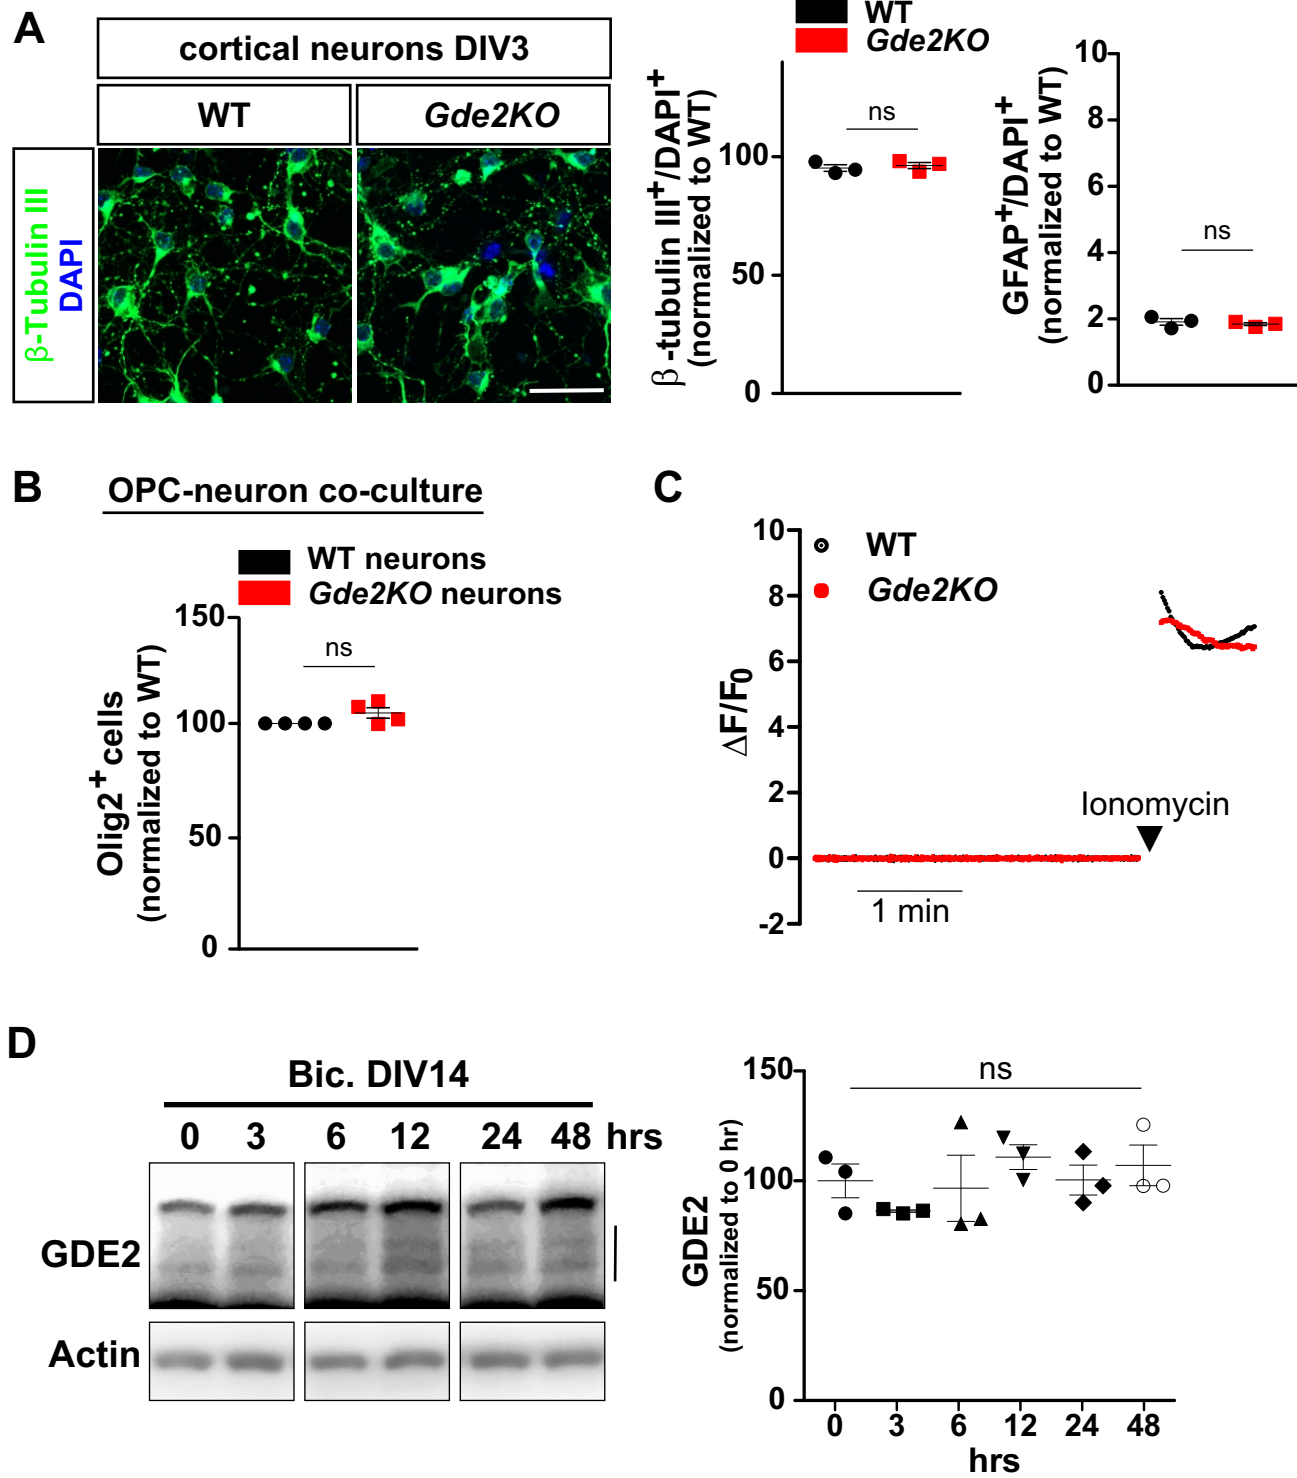



**Figure S4. Related to Figure 4. Characterization of neuron-OPC co-cultures.**

(A) Immunocytochemical staining of DIV3 cortical neuronal cultures. Scale bar: 50  $\mu\text{m}$ . Graphs quantifying percentage neurons ( $\beta$ -tubulin III+) and astrocytes in DIV3 WT and *Gde2KO* cortical neuronal cultures ( $\beta$ -tubulin III+ ns  $p = 0.6243$ ; GFAP+ ns  $p = 0.6093$ ;  $n = 3$  WT 3 *Gde2KO*). (B) Graph quantifying the number of Olig2+ cells after neuron-OPC co-culture (ns  $p = 0.1235$ ,  $n = 4$  WT neuron-WT OPC co-cultures, 4 *Gde2KO* neuron-WT OPC co-cultures). Two tailed unpaired Student's t-test. All graphs: Mean  $\pm$  sem. (C) Graph of fluorescence changes ( $\Delta F/F_0$ ) in DIV3 WT and *Gde2KO* neurons loaded with the calcium indicator Fluo-4 over a 3.5 minute period. Each data point represents mean value of  $\Delta F/F_0$  from at least 11 recordings per group at a given time. Arrowhead marks the time of Ionomycin addition, which permeabilizes the membrane and acts as a positive control. (D) Western blot of DIV14 cortical neurons treated with bicuculine for specified times. Bar denotes GDE2. Graph quantifying GDE2 protein levels show no change in expression after stimulation. 1 way ANOVA ns  $p = 0.4692$ ,  $n = 3$  for each timepoint.

# Figure S5

## A RNA-seq Genes (WT vs. *Gde2KO*)

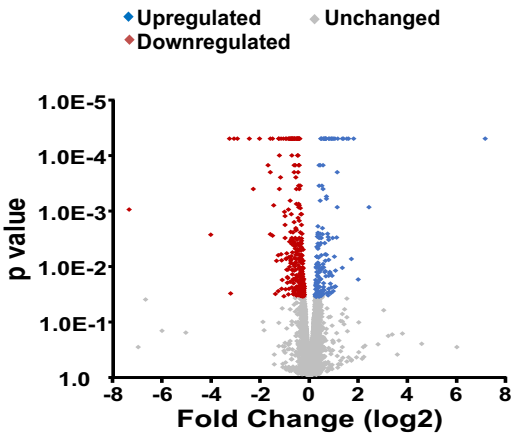

## B Gene Ontology (GO) Analysis

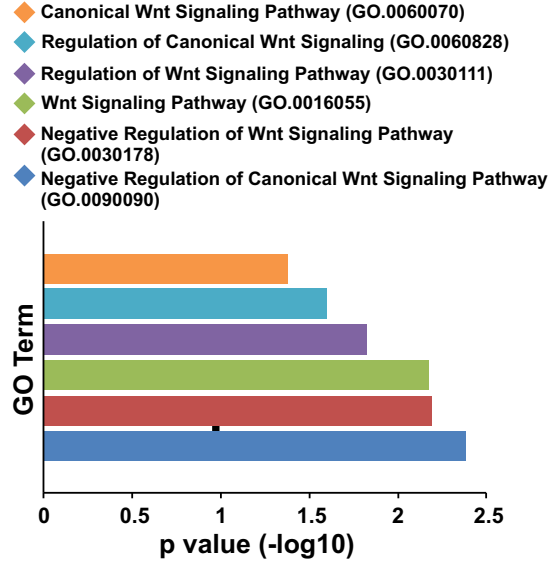

## C

| Gene name    | log2(FC)  | p value |
|--------------|-----------|---------|
| <i>Mitf</i>  | -2.03989  | 0.00005 |
| <i>Pttg1</i> | -0.685154 | 0.00005 |
| <i>Sox9</i>  | -0.440899 | 0.00005 |
| <i>Vegfc</i> | -0.678135 | 0.00245 |
| <i>Islr</i>  | -0.387588 | 0.0037  |
| <i>Axin2</i> | -0.353966 | 0.024   |
| <i>Cd44</i>  | -0.314482 | 0.0263  |

## D

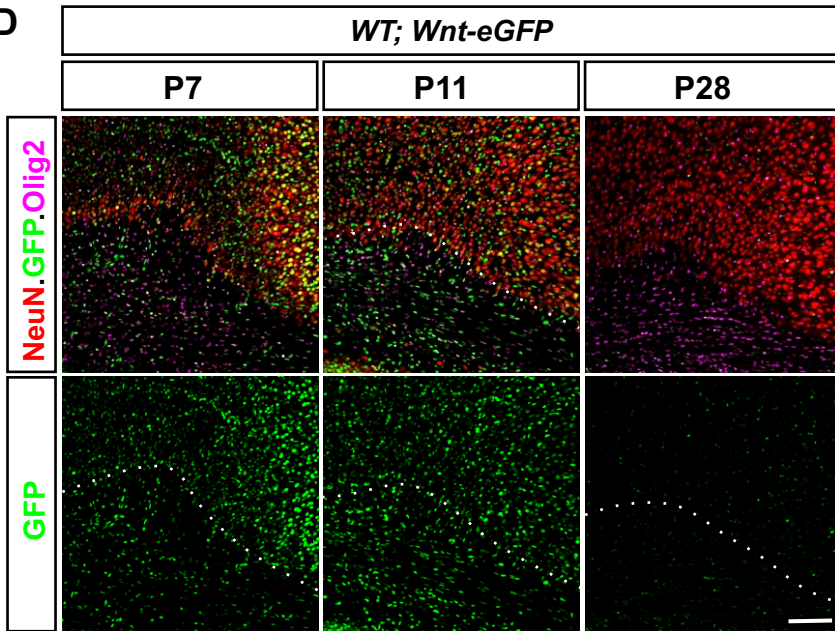

## F

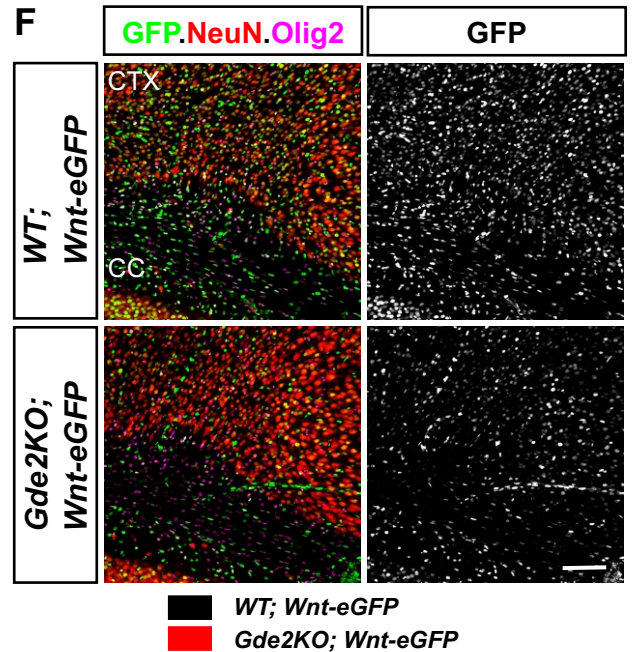

## E

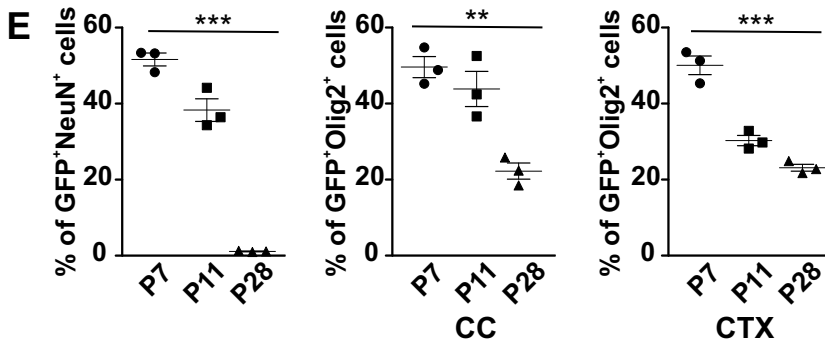

## G

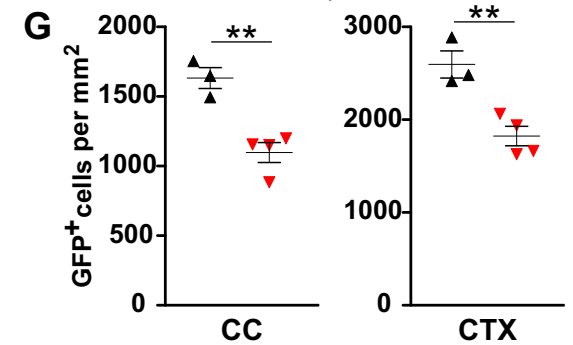

## H

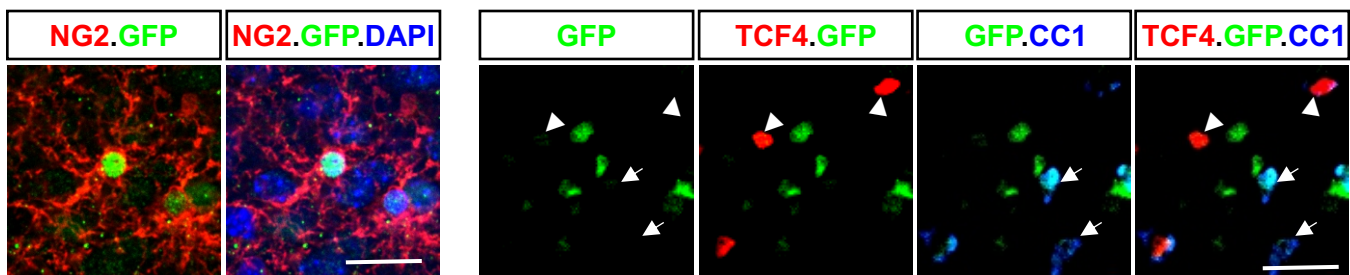

**Figure S5. Related to Figure 5. Canonical Wnt signaling is reduced when GDE2 is disrupted.**

(A) Volcano plot showing differentially expressed genes between WT and *Gde2KO* spinal cord. (B) Gene ontology analysis using p-value ( $< 0.05$ ) highlights Wnt signaling pathways are disrupted in absence of GDE2. (C) List of known Wnt target genes that are altered in *Gde2KO* condition. (D) Analysis of Wnt-reporter animals (*Wnt-eGFP*) show that canonical Wnt signaling (eGFP) is high at P7 and P11 but is minimal at P28. Hatched line marks the boundary between cortex and corpus callosum. (E) Graphs quantifying the percentage of reporter gene expression in *Wnt-eGFP* mice at P7, P11 and P28 in neurons (NeuN+) and oligodendroglia (Olig2+) in corpus callosum (CC) and cortex (CTX). GFP+NeuN+  $***p < 0.0001$ , GFP+Olig2+ CC  $**p = 0.0027$ , GFP+Olig2+ CTX  $***p < 0.0001$ .  $n = 3$  P7, 3 P11, 3 P28, 1-way ANOVA. Data for P11 are the same as presented in Figure 4F and 4H (WT) and are included here for comparison purposes. (F) Coronal sections of P11 *WT*; *Wnt-eGFP* and *Gde2KO*;*Wnt-eGFP* animals (G) Graphs quantifying GFP+ cells in CC and CTX. CC  $**p = 0.004$ , CTX  $**p = 0.007$ ,  $n = 3$  *WT*; *Wnt-eGFP*, 4 *Gde2KO*;*Wnt-eGFP*, two-tailed unpaired t-test. (H) Representative image of P11 cortex of *Wnt-eGFP* mice. Arrowheads mark TCF4+CC1- immature OLs, arrows mark mature CC1+ OLs; both populations do not co-express eGFP. All graphs: Mean  $\pm$  sem. Scale bar: (D, F) 100  $\mu$ m, (H) 20 $\mu$ m.

Figure S6

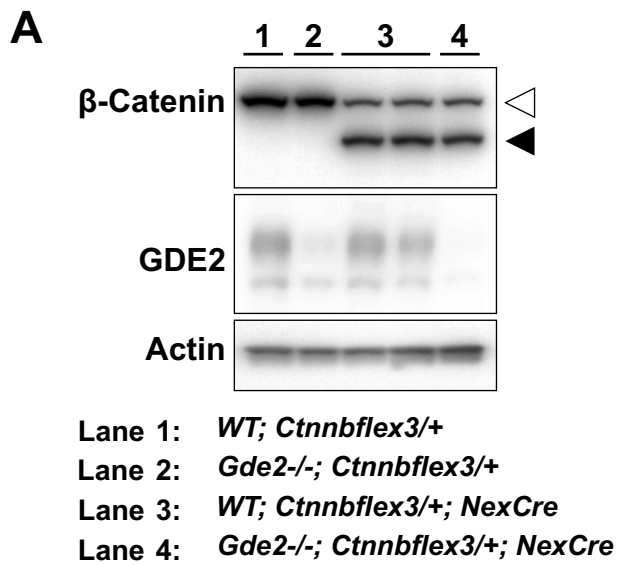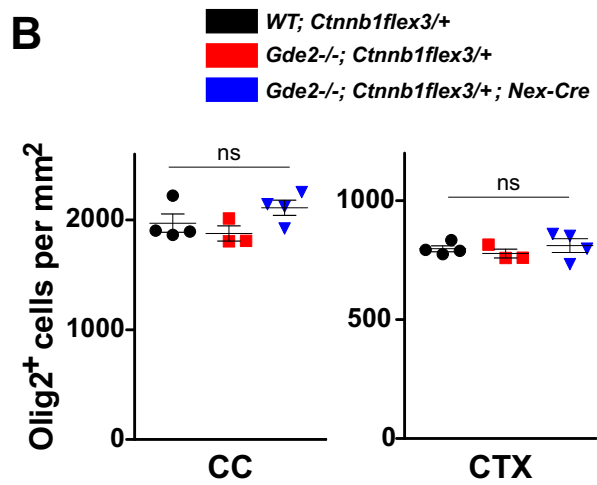

**Figure S6. Related to Figure 6. Genetic stabilization of  $\beta$ -catenin in neurons does not change total Olig2+ cells.**

(A) Western blot of P14 cortical extracts. Open arrowhead marks WT  $\beta$ -catenin; black arrowhead marks  $\beta$ -catenin deleted for exon 3. Actin is used as a loading control. (B) Graphs quantifying the number of Olig2+ cells in P11 corpus callosum (CC) and cortex (CTX). ns CC p = 0.1608 (1-way ANOVA/Bonferroni's multiple comparison test), ns CTX p = 0.6109 (1-way ANOVA/Bonferroni's multiple comparison test). n = 4 *WT*;  $\beta$ -cat<sup>ex3</sup>, 3 *Gde2KO*;  $\beta$ -cat<sup>ex3</sup>, 4 *Gde2KO*; N- $\beta$ -cat<sup>ex3</sup>. All graphs: Mean  $\pm$  sem.

Figure S7

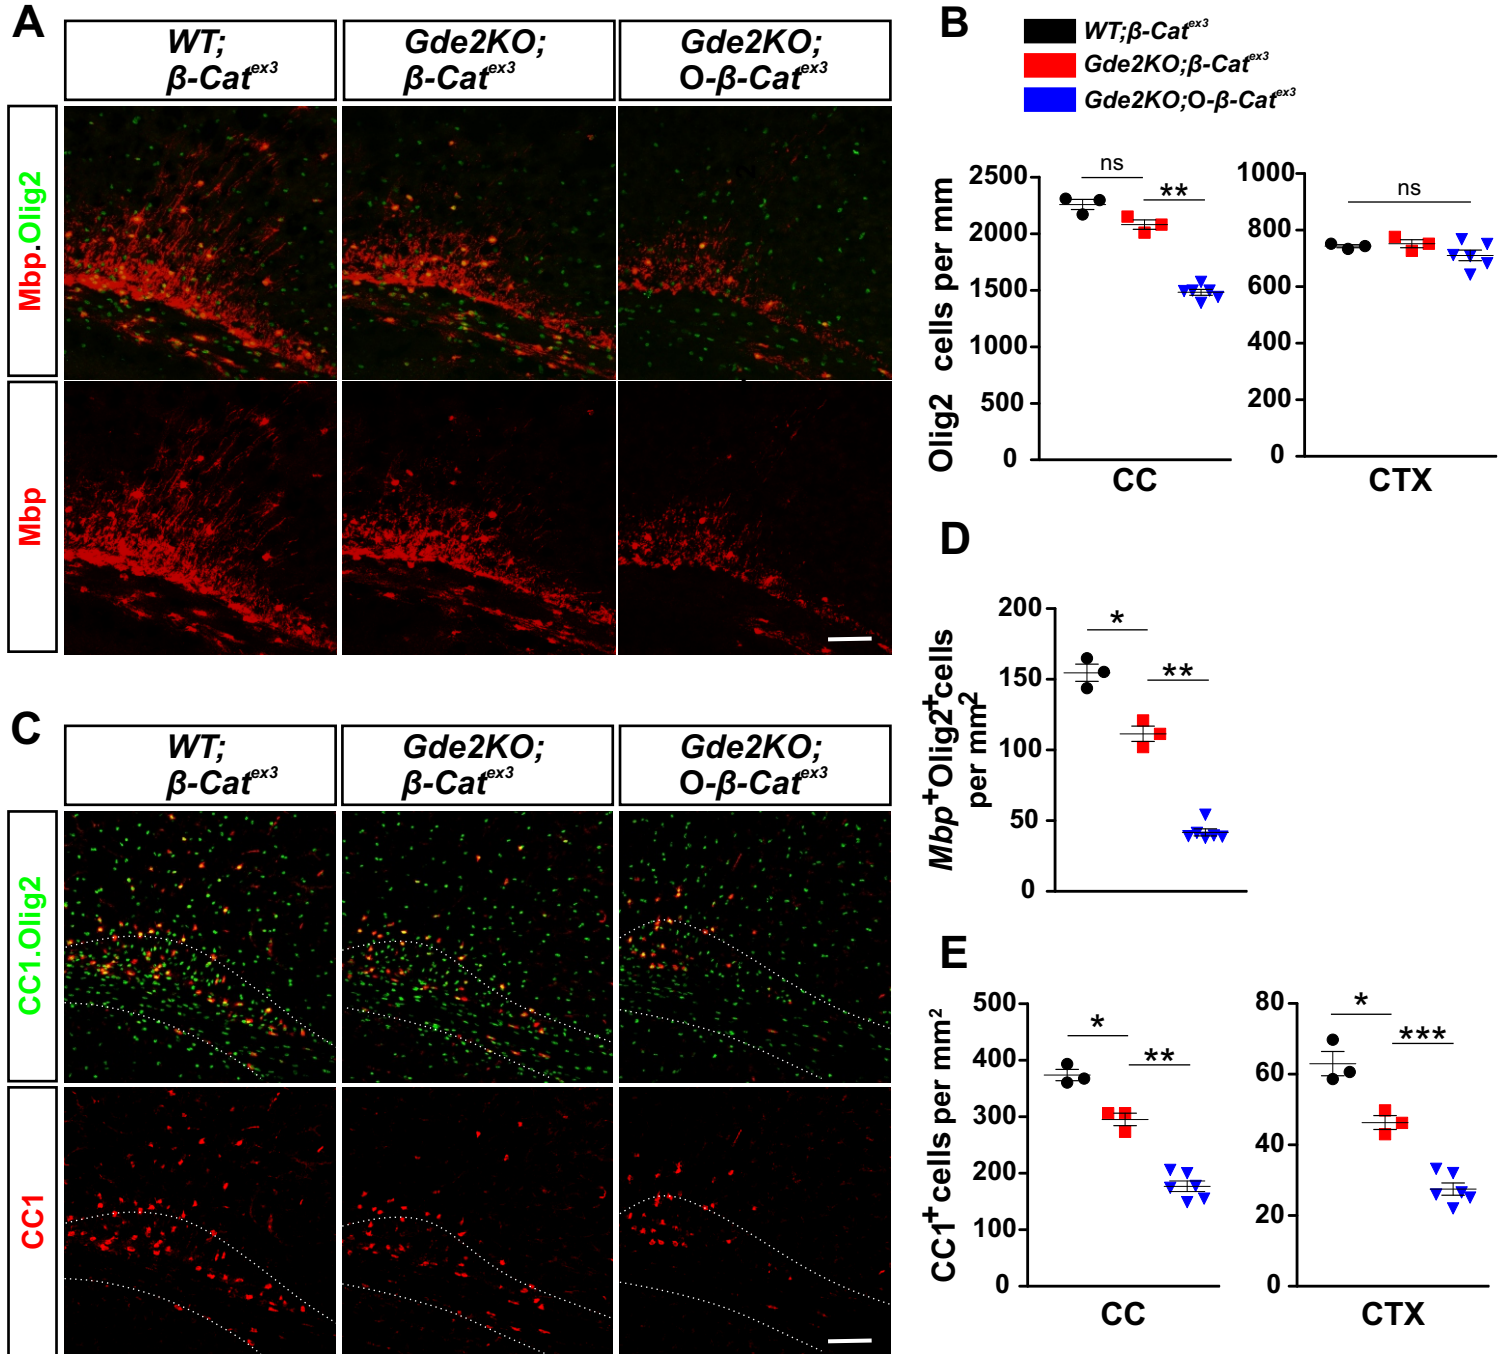

**Figure S7. Related to Figure 5. Stabilization of  $\beta$ -catenin in OPCs does not rescue *Gde2KO* OL maturation.**

(A, C) Coronal sections of P11 mouse cortex (CTX) and corpus callosum (CC). Hatched lines in panel C outlines CC boundaries. (B) Graphs quantifying the number of Olig2+ cells in CC and CTX. CC ns  $p = 0.0601$ ,  $**p = 0.0011$ , two-tailed unpaired t- test; CTX ns  $p = 0.1235$ , 1-way ANOVA Bonferroni's multiple comparison test, all 3 genotypes.  $n = 3$  *WT*;  $\beta$ -*cat*<sup>ex3</sup>, 3 *Gde2KO*;  $\beta$ -*cat*<sup>ex3</sup>, 6 *Gde2KO*; O- $\beta$ -*cat*<sup>ex3</sup>. (D) Graph quantifying the number of MBP+Olig2+ cells  $*p = 0.0132$ ,  $**p = 0.0073$ ,  $n = 3$  *WT*;  $\beta$ -*cat*<sup>ex3</sup>, 3 *Gde2KO*;  $\beta$ -*cat*<sup>ex3</sup>, 6 *Gde2KO*; O- $\beta$ -*cat*<sup>ex3</sup>. Two tailed unpaired Student's t-test. (E) Graphs quantifying number of CC1+ OLs. CC  $*p = 0.0132$ ,  $**p = 0.0012$ ; CTX  $*p = 0.0242$ ,  $***p = 0.0008$ ,  $n = 3$  *WT*;  $\beta$ -*cat*<sup>ex3</sup>, 3 *Gde2KO*;  $\beta$ -*cat*<sup>ex3</sup>, 6 *Gde2KO*; O- $\beta$ -*cat*<sup>ex3</sup>. Two tailed unpaired Student's t-test. All graphs: Mean  $\pm$  sem. Scale bars: 100  $\mu$ m.

Figure S8

A

| Protein name                    | Gene name     | KO/WT ratio |
|---------------------------------|---------------|-------------|
| Glypican-1;Secreted glypican-1  | <i>Gpc1</i>   | 0.82        |
| Glypican-2;Secreted glypican-2  | <i>Gpc2</i>   | 0.91        |
| Semaphorin-7A                   | <i>Sema7a</i> | 0.94        |
| Cadherin-13                     | <i>Cdh13</i>  | 0.95        |
| Contactin-2 (a.k.a. TAG-1)      | <i>Cntn2</i>  | 1.05        |
| Neural cell adhesion molecule 1 | <i>Ncam1</i>  | 1.11        |
| RGM domain family member B      | <i>Rgmb</i>   | 1.22        |
| Lipoprotein lipase              | <i>Lpl</i>    | 1.23        |
| Repulsive guidance molecule A   | <i>Rgma</i>   | 1.25        |
| Contactin-1                     | <i>Cntn1</i>  | 1.25        |
| Neural cell adhesion molecule 2 | <i>Ncam2</i>  | 1.40        |

B

| Protein name                                    | Gene name       | KO/WT ratio |
|-------------------------------------------------|-----------------|-------------|
| Carboxypeptidase B2                             | <i>Cpb2</i>     | 0.33        |
| Phosphatidylethanolamine-binding protein 1      | <i>Pebp1</i>    | 0.43        |
| Receptor-type tyrosine-protein phosphatase zeta | <i>Ptprz1</i>   | 0.44        |
| Gamma-glutamyl hydrolase                        | <i>Ggh</i>      | 0.47        |
| Follistatin-related protein 5                   | <i>Fstl5</i>    | 0.50        |
| Glucose-6-phosphate isomerase                   | <i>Gpi</i>      | 0.51        |
| ProSAAS                                         | <i>Pcsk1n</i>   | 0.53        |
| Noelin                                          | <i>Olfm1</i>    | 0.53        |
| Glia-derived nexin                              | <i>Serpine2</i> | 0.54        |
| Complement C5                                   | <i>C5</i>       | 0.57        |
| Collagen alpha-1(I) chain                       | <i>Col1a1</i>   | 3.98        |

C

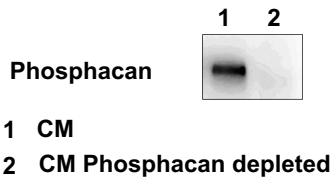

D

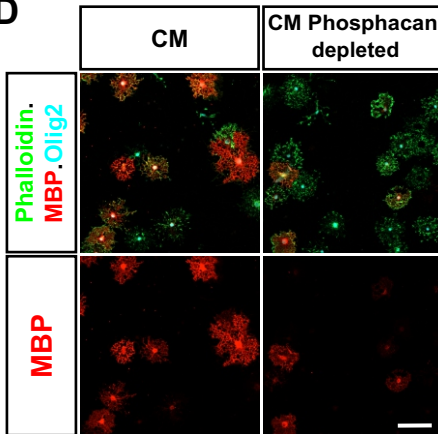

E

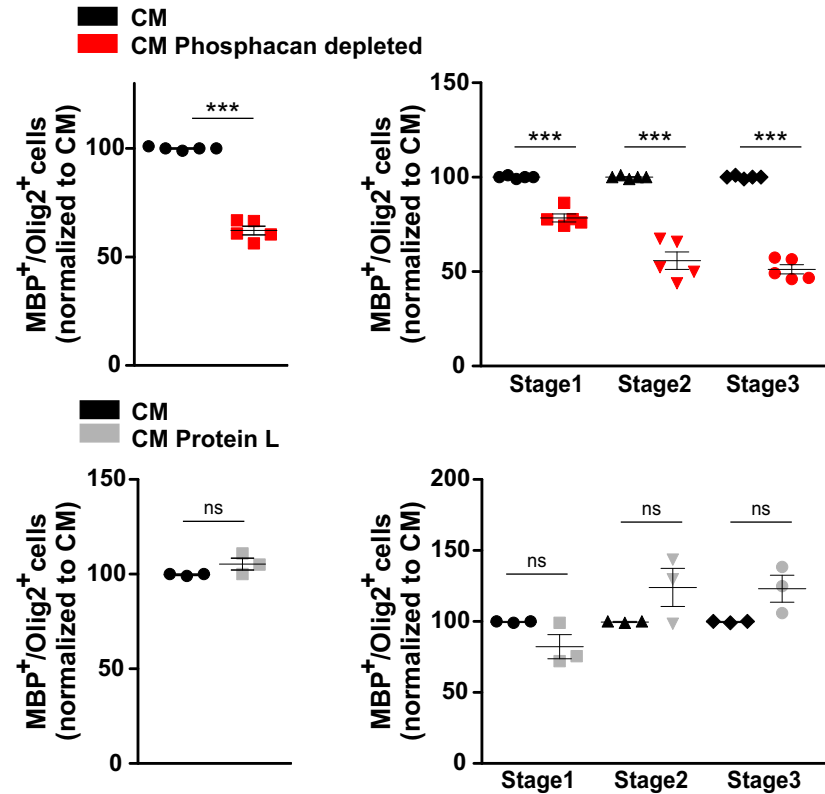

F

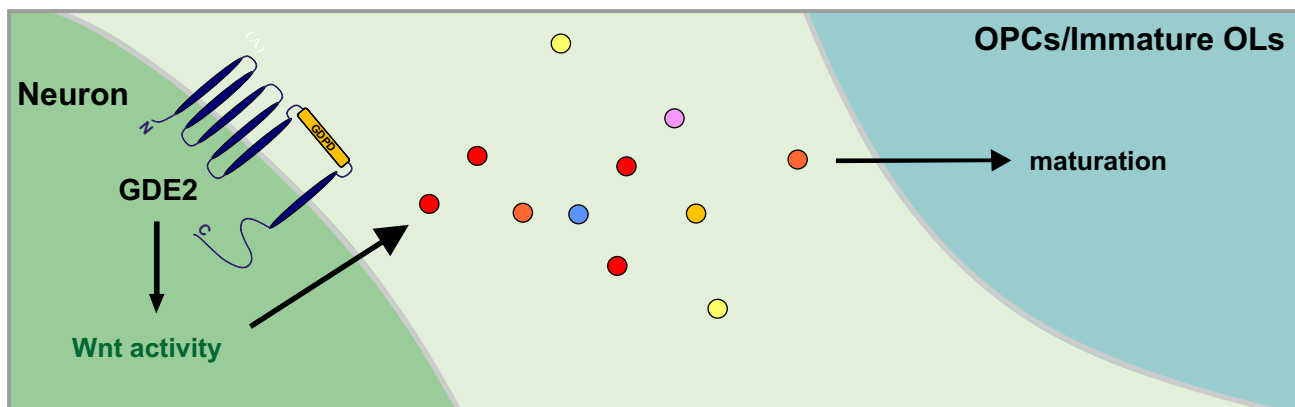



**Figure S8. Related to Figure 7. Candidate mechanisms for GDE2-dependent OL maturation.**

(A) List of GPI-anchored proteins identified in WT and *Gde2*KO CM by mass spectrometry. (B) List of secreted and extracellular matrix proteins identified in WT and *Gde2*KO CM by mass spectrometry. RPTPzeta (phosphacan) is highlighted in red. (C) Western blot of WT neuronal CM showing effective depletion of phosphacan using neuronal phosphacan antibodies conjugated to protein-L (D) Representative images of WT OPCs after culturing with WT neuronal CM and WT neuronal CM depleted for phosphacan. (E) Graphs quantifying the percentage of MBP+Olig2+ OLs (normalized to WT CM) in WT OPC cultures grown with WT neuronal CM or phosphacan depleted WT neuronal CM. Top panel \*\*\* $p < 0.0001$ ,  $n = 5$  WT CM, 5 Phosphacan depleted CM, two tailed unpaired t-test. All 3 stages of OL maturation are also affected (2-way ANOVA \*\*\* $p < 0.0001$ ; Bonferroni correction Stage 1 \*\*\* $p < 0.001$ ; Stage 2 \*\*\* $p < 0.001$ ; Stage 3 \*\*\* $p < 0.001$ ;  $n = 5$  WT CM, 5 Phosphacan depleted CM. No change in OPC maturation is observed between WT neuronal CM or WT neuronal CM preincubated with protein L alone. Bottom panel ns  $p = 0.1456$ ,  $n = 3$  WT CM, 3 Protein L incubated CM, two tailed unpaired t-test. Similarly, stages of OL maturation are unchanged (2-way ANOVA ns  $p = 0.1262$ ; Bonferroni correction Stage 1 ns  $p > 0.05$ ; Stage 2 ns  $p > 0.05$ ; Stage 3 ns  $p > 0.05$ ;  $n = 5$  WT CM, 5 Phosphacan depleted CM.(F) Model for GDE2 regulation of OL maturation. GDE2 stimulates canonical Wnt signaling in neurons. Wnt activation leads to release of neuronally-derived factors such as phosphacan, which act on neighboring OPCs or immature OLs to promote their maturation into myelinating oligodendrocytes.

**Table S1: Cell counts for in vitro cultures. Refers to Figure 4, Figure 7, and Figure S8.**

| Fig 4 | B/F              |      |               | D/F         |      |               | D           |     |               |
|-------|------------------|------|---------------|-------------|------|---------------|-------------|-----|---------------|
|       | DIV3+4_coculture | WT   | <i>Gde2KO</i> | DIV3+4 CM   | WT   | <i>Gde2KO</i> | DIV3 CM     | WT  | <i>Gde2KO</i> |
|       | Olig2+           | 2959 | 3030          | Olig2+      | 1251 | 1126          | Olig2+      | 730 | 907           |
|       | MBP_stage 1      | 159  | 89            | MBP_stage 1 | 251  | 194           | MBP_stage 1 | 50  | 60            |
|       | MBP_stage 2      | 116  | 43            | MBP_stage 2 | 219  | 147           | MBP_stage 2 | 71  | 51            |
|       | MBP_Stage 3      | 53   | 18            | MBP_Stage 3 | 62   | 30            | MBP_Stage 3 | 48  | 27            |
|       | total MBP+       | 328  | 152           | total MBP+  | 532  | 371           | total MBP+  | 169 | 138           |

| Fig 7B      | <i>Gde2KO</i> ; $\beta$ -Cat <sup>ex3</sup> CM |     | <i>Gde2KO</i> ; N- $\beta$ -Cat <sup>ex3</sup> CM |  |
|-------------|------------------------------------------------|-----|---------------------------------------------------|--|
|             | Olig2+                                         | 936 | 894                                               |  |
| MBP_stage 1 | 65                                             | 100 |                                                   |  |
| MBP_stage 2 | 26                                             | 43  |                                                   |  |
| MBP_Stage 3 | 17                                             | 28  |                                                   |  |
| total MBP+  | 108                                            | 171 |                                                   |  |

| Fig S8E     | CM     |      | CM phsophacan depleted |        | CM protein L |     |
|-------------|--------|------|------------------------|--------|--------------|-----|
|             | Olig2+ | 2189 | 2815                   | Olig2+ | 1007         | 869 |
| MBP_stage 1 | 290    | 306  | MBP_stage 1            | 132    | 97           |     |
| MBP_stage 2 | 377    | 278  | MBP_stage 2            | 132    | 140          |     |
| MBP_Stage 3 | 189    | 138  | MBP_Stage 3            | 61     | 67           |     |
| total MBP+  | 856    | 722  | total MBP+             | 325    | 304          |     |

**Table S3: Related to Supplemental Figure 8. List of proteins showing > 40% differential enrichment in Gde2KO CM.**

Number of altered protein expression: 149

| Protein IDs | Protein names                                                 | Gene names      | Sequence coverage KO [%] | Sequence coverage WT [%] | LFQ intensity KO | LFQ intensity WT | Ratio (KO/WT) |
|-------------|---------------------------------------------------------------|-----------------|--------------------------|--------------------------|------------------|------------------|---------------|
| A8DUK4      | beta-globin                                                   | <i>Hbbt1</i>    | 60.9                     | 58.2                     | 3.67E+06         | 3.93E+08         | 0.0093385     |
| Q80ZV4      | Cadherin-4                                                    | <i>Cdh4</i>     | 3.6                      | 3.6                      | 3.59E+05         | 6.73E+06         | 0.0533103     |
| P35979      | 60S ribosomal protein L12                                     | <i>Olfm1</i>    | 9.7                      | 9.7                      | 3.50E+05         | 3.35E+06         | 0.104707      |
| Q3TLP8      | Ras-related C3 botulinum toxin substrate 1                    | <i>Rac1</i>     | 9.45                     | 12.3                     | 1.22E+06         | 1.16E+07         | 0.1055619     |
| P58283      | E3 ubiquitin-protein ligase RNF216                            | <i>Rnf216</i>   | 0.8                      | 0.8                      | 7.20E+05         | 5.81E+06         | 0.1241085     |
| Q6ZWQ9      | Myosin regulatory light chain 12B                             | <i>Myl12a</i>   | 17.4                     | 9.3                      | 2.92E+06         | 2.11E+07         | 0.1384735     |
| P48678      | Prelamin-A/C                                                  | <i>Lmna</i>     | 1.8                      | 0.75                     | 7.71E+04         | 3.94E+05         | 0.1955637     |
| F6VYE2      | Zinc finger MYM-type protein 4                                | <i>Zmym4</i>    | 0.7                      | 0.7                      | 3.81E+07         | 1.28E+08         | 0.2985482     |
| G5E866      | Splicing factor 3B subunit 1                                  | <i>Sf3b1</i>    | 0.35                     | 1.1                      | 6.29E+05         | 2.08E+06         | 0.3018324     |
| Q99JL6      | Ras-related protein Rap-1b                                    | <i>Rap1b</i>    | 11.15                    | 11.15                    | 2.20E+06         | 7.24E+06         | 0.304105      |
| P62897      | Cytochrome c, somatic                                         | <i>Cycc</i>     | 17.15                    | 17.15                    | 1.47E+06         | 4.78E+06         | 0.3074461     |
| P32233      | Developmentally-regulated GTP-binding protein 1               | <i>Drg1</i>     | 4.4                      | 4.4                      | 4.55E+05         | 1.37E+06         | 0.3315903     |
| Q2KIG3      | Carboxypeptidase B2                                           | <i>Cpb2</i>     | 2.6                      | 2.15                     | 2.81E+05         | 8.34E+05         | 0.3367496     |
| P19253      | 60S ribosomal protein L13a                                    | <i>Rpl13a</i>   | 8.1                      | 8.1                      | 1.20E+06         | 3.52E+06         | 0.3409558     |
| P97350      | Plakophilin-1                                                 | <i>Pkp1</i>     | 2.25                     | 2.25                     | 2.43E+06         | 6.66E+06         | 0.3647232     |
| P62242      | 40S ribosomal protein S8                                      | <i>Rps8</i>     | 8.9                      | 7.2                      | 7.11E+05         | 1.75E+06         | 0.4058655     |
| Q3UHN9      | Bifunctional heparan sulfate N-deacetylase                    | <i>Ndst1</i>    | 0.8                      | 1.6                      | 9.53E+05         | 2.35E+06         | 0.4063519     |
| A0A087WPL5  | ATP-dependent RNA helicase A                                  | <i>Dhx9</i>     | 0.6                      | 0.85                     | 4.55E+05         | 1.11E+06         | 0.4094201     |
| Q8QZY9      | Splicing factor 3B subunit 4                                  | <i>Sf3b4</i>    | 1.65                     | 3.3                      | 2.16E+06         | 5.03E+06         | 0.4288        |
| P70296      | Phosphatidylethanolamine-binding protein 1                    | <i>Pebp1</i>    | 32.6                     | 29.15                    | 4.56E+07         | 1.05E+08         | 0.4363098     |
| Q62189      | U1 small nuclear ribonucleoprotein A                          | <i>Snrpa</i>    | 9.55                     | 9.55                     | 7.22E+06         | 1.64E+07         | 0.4395122     |
| B9EKR1      | Receptor-type tyrosine-protein phosphatase zeta               | <i>Ptporz1</i>  | 7.05                     | 6.8                      | 1.08E+08         | 2.43E+08         | 0.445375      |
| Q9DBG3      | AP-2 complex subunit beta;AP complex subunit beta             | <i>Ap2b1</i>    | 2                        | 1.3                      | 2.06E+06         | 4.55E+06         | 0.4524362     |
| Q60648      | Ganglioside GM2 activator                                     | <i>Gm2a</i>     | 8.8                      | 4.4                      | 1.39E+06         | 2.98E+06         | 0.4666868     |
| Q9CXV9      | DCN1-like protein 5                                           | <i>Dcn1d5</i>   | 6.3                      | 6.3                      | 3.76E+07         | 8.06E+07         | 0.466781      |
| Q9Z0L8      | Gamma-glutamyl hydrolase                                      | <i>Ggh</i>      | 12.9                     | 12.9                     | 6.49E+06         | 1.37E+07         | 0.4751144     |
| P80317      | T-complex protein 1 subunit zeta                              | <i>Cct6a</i>    | 4.35                     | 2.85                     | 1.13E+06         | 2.35E+06         | 0.4792104     |
| B1AX58      | Plastin-3                                                     | <i>Pls3</i>     | 0.7                      | 1.4                      | 8.46E+05         | 1.76E+06         | 0.4811927     |
| Q9R1P3      | Proteasome subunit beta type-2                                | <i>Psmb2</i>    | 6.2                      | 9.95                     | 8.15E+06         | 1.65E+07         | 0.4936686     |
| Q8R093      | Uridine phosphorylase                                         | <i>Upp2</i>     | 4.2                      | 2.1                      | 5.18E+07         | 1.03E+08         | 0.5007006     |
| Q8BFR2      | Follistatin-related protein 5                                 | <i>Fstl5</i>    | 8                        | 9.8                      | 1.04E+07         | 2.08E+07         | 0.5017444     |
| Q9EST1      | Gasdermin-A                                                   | <i>Gsdma</i>    | 2.6                      | 2.6                      | 1.80E+06         | 3.50E+06         | 0.5148759     |
| Q91V64      | Isochorismatase domain-containing protein 1                   | <i>Isoc1</i>    | 5.2                      | 10.4                     | 1.33E+06         | 2.58E+06         | 0.5164249     |
| P06745      | Glucose-6-phosphate isomerase                                 | <i>Gpi</i>      | 5.2                      | 5.2                      | 9.57E+05         | 1.84E+06         | 0.518811      |
| Q9CQU0      | Thioredoxin domain-containing protein 12                      | <i>Txndc12</i>  | 6.45                     | 4.4                      | 1.93E+06         | 3.68E+06         | 0.5235417     |
| Q08331      | Calretinin                                                    | <i>Calb2</i>    | 11.8                     | 11.8                     | 3.97E+06         | 7.51E+06         | 0.5290136     |
| Q9QXV0      | ProSAAS                                                       | <i>Pcsk1n</i>   | 12.2                     | 10.5                     | 9.84E+06         | 1.85E+07         | 0.53233       |
| A3KGE4      | Noelin                                                        | <i>Olfm1</i>    | 4.3                      | 4.3                      | 7.73E+05         | 1.44E+06         | 0.5356937     |
| Q3TKX1      | V-type proton ATPase subunit S1                               | <i>Atp6ap1</i>  | 14.2                     | 14.2                     | 1.28E+07         | 2.37E+07         | 0.5403885     |
| Q9DAY9      | Nucleophosmin                                                 | <i>Npm1</i>     | 4.1                      | 1.7                      | 1.17E+07         | 2.15E+07         | 0.5426547     |
| Q07235      | Glia-derived nexin                                            | <i>Serpine2</i> | 13.35                    | 13.35                    | 5.49E+06         | 1.00E+07         | 0.5480371     |
| Q9JJU8      | SH3 domain-binding glutamic acid-rich-like protein            | <i>Sh3bgrl</i>  | 25                       | 18                       | 7.48E+06         | 1.36E+07         | 0.548844      |
| P61164      | Alpha-centractin                                              | <i>Actr1a</i>   | 2.95                     | 7.85                     | 1.46E+06         | 2.65E+06         | 0.550069      |
| P61358      | 60S ribosomal protein L27                                     | <i>Rpl27</i>    | 7.35                     | 10.65                    | 2.31E+06         | 4.20E+06         | 0.5504141     |
| O09061      | Proteasome subunit beta type-1                                | <i>Psmb1</i>    | 14.15                    | 18.3                     | 1.62E+07         | 2.92E+07         | 0.5534894     |
| Q5RKN9      | F-actin-capping protein subunit alpha-1                       | <i>Capza1</i>   | 13.6                     | 13.6                     | 4.36E+06         | 7.85E+06         | 0.5548677     |
| E9PYH2      | Cytosolic acyl coenzyme A thioester hydrolase                 | <i>Acot7</i>    | 8.3                      | 6.75                     | 6.44E+06         | 1.15E+07         | 0.559416      |
| P24369      | Peptidyl-prolyl cis-trans isomerase B                         | <i>Ppiib</i>    | 18.05                    | 16                       | 2.04E+07         | 3.62E+07         | 0.5644408     |
| Q9D1C8      | Vacuolar protein sorting-associated protein 28 homolog        | <i>Vps28</i>    | 2.75                     | 5.5                      | 7.42E+05         | 1.31E+06         | 0.5652669     |
| Q3TX55      | Actin-related protein 2/3 complex subunit 4                   | <i>Arpc4</i>    | 20.25                    | 17.9                     | 1.39E+07         | 2.44E+07         | 0.569117      |
| P62702      | 40S ribosomal protein S4                                      | <i>Gm15013</i>  | 5.1                      | 8.1                      | 7.23E+06         | 1.27E+07         | 0.569801      |
| S4R1N6      | 40S ribosomal protein S18                                     | <i>Rps18</i>    | 22.9                     | 18.7                     | 1.08E+07         | 1.88E+07         | 0.5729743     |
| P06684      | Complement C5                                                 | <i>C5</i>       | 1.05                     | 1.05                     | 2.07E+06         | 3.60E+06         | 0.5752787     |
| D3Z6E4      | Enolase;Gamma-enolase                                         | <i>Eno2</i>     | 6.35                     | 7.9                      | 4.46E+05         | 7.64E+05         | 0.5833966     |
| P50247      | Adenosylhomocysteinase                                        | <i>Ahcy</i>     | 9                        | 9                        | 5.44E+06         | 9.19E+06         | 0.5925307     |
| P20029      | 78 kDa glucose-regulated protein                              | <i>Hspa5</i>    | 7.25                     | 9.4                      | 2.20E+06         | 3.68E+06         | 0.5991105     |
| P55821      | Stathmin-2                                                    | <i>Stmn2</i>    | 14.5                     | 14.5                     | 2.67E+07         | 1.91E+07         | 1.4007286     |
| O35136      | Neural cell adhesion molecule 2                               | <i>Ncam2</i>    | 3.5                      | 3.5                      | 2.09E+06         | 1.49E+06         | 1.4047028     |
| Q60994      | Adiponectin                                                   | <i>Adipoq</i>   | 10.75                    | 10.75                    | 7.19E+07         | 5.10E+07         | 1.4090303     |
| Q60864      | Stress-induced-phosphoprotein 1                               | <i>Stip1</i>    | 2.9                      | 2.9                      | 5.38E+06         | 3.81E+06         | 1.4108147     |
| D3YYE1      | Acidic leucine-rich nuclear phosphoprotein 32 family member A | <i>Anp32a</i>   | 13.9                     | 17.2                     | 1.19E+07         | 8.38E+06         | 1.4150217     |
| Q8BGQ7      | Alanine--tRNA ligase, cytoplasmic                             | <i>Aars</i>     | 0.9                      | 0.9                      | 1.01E+06         | 7.09E+05         | 1.4222222     |
| Q93092      | Transaldolase                                                 | <i>Taldo1</i>   | 14                       | 11.5                     | 1.43E+08         | 9.97E+07         | 1.4302839     |
| Q99J36      | THUMP domain-containing protein 1                             | <i>Thumpd1</i>  | 8.45                     | 7.3                      | 2.46E+06         | 1.72E+06         | 1.434379      |
| Q99PT1      | Rho GDP-dissociation inhibitor 1                              | <i>Arhgdia</i>  | 29.9                     | 30.15                    | 8.03E+07         | 5.58E+07         | 1.4393366     |
| Q61598      | Rab GDP dissociation inhibitor beta                           | <i>Gdi2</i>     | 17.75                    | 16.95                    | 5.91E+07         | 4.07E+07         | 1.4504449     |
| A2A418      | Amine oxidase                                                 | <i>Aoc3</i>     | 1.9                      | 1.9                      | 1.04E+08         | 7.17E+07         | 1.45059       |
| P08030      | Adenine phosphoribosyltransferase                             | <i>Aprt</i>     | 10                       | 7.2                      | 4.33E+06         | 2.98E+06         | 1.4560516     |
| P21460      | Cystatin-C                                                    | <i>Cst3</i>     | 27.5                     | 27.5                     | 5.77E+08         | 3.93E+08         | 1.4677356     |
| P35441      | Thrombospondin-1                                              | <i>Thbs1</i>    | 4.8                      | 5                        | 6.15E+06         | 4.14E+06         | 1.4860469     |
| P04444      | Hemoglobin subunit beta-H1                                    | <i>Hbb-bh1</i>  | 21.1                     | 21.1                     | 7.56E+06         | 5.08E+06         | 1.4896048     |
| P02104      | Hemoglobin subunit epsilon-Y2                                 | <i>Hbb-y</i>    | 40.15                    | 39.15                    | 2.39E+08         | 1.60E+08         | 1.4902499     |
| Q8CBG6      | 6-phosphogluconolactonase                                     | <i>Pglis</i>    | 7.2                      | 10.9                     | 4.86E+06         | 3.26E+06         | 1.4918735     |
| P63158      | High mobility group protein B1                                | <i>Hmgb1</i>    | 24.3                     | 24                       | 5.03E+07         | 3.37E+07         | 1.4921339     |
| Q564E2      | L-lactate dehydrogenase                                       | <i>Ldha</i>     | 32.5                     | 32.5                     | 1.43E+08         | 9.51E+07         | 1.5027012     |
| P34022      | Ran-specific GTPase-activating protein                        | <i>Ranbp1</i>   | 8.1                      | 10.8                     | 5.39E+06         | 3.58E+06         | 1.5047218     |
| P62869      | Transcription elongation factor B polypeptide 2               | <i>Tceb2</i>    | 26.25                    | 22                       | 7.90E+06         | 5.24E+06         | 1.5070908     |
| Q70251      | Elongation factor 1-beta                                      | <i>Eef1b2</i>   | 11.7                     | 15.2                     | 6.12E+06         | 4.03E+06         | 1.5189003     |
| Q9WU60      | Attractin                                                     | <i>Atrn</i>     | 0.55                     | 0.55                     | 2.72E+06         | 1.78E+06         | 1.5249867     |

|        |                                                             |                  |       |       |          |          |           |
|--------|-------------------------------------------------------------|------------------|-------|-------|----------|----------|-----------|
| A2AI62 | Hephaestin                                                  | <i>Heph</i>      | 0.9   | 0.9   | 6.04E+07 | 3.94E+07 | 1.5319845 |
| Q5XJF6 | Ribosomal protein                                           | <i>Rpl10a</i>    | 12.4  | 12.4  | 1.26E+07 | 8.16E+06 | 1.5469304 |
| Q9WTP6 | Adenylate kinase 2                                          | <i>Ak2</i>       | 6.9   | 4.2   | 6.54E+05 | 4.19E+05 | 1.560639  |
| P21619 | Lamin-B2                                                    | <i>Lmnb2</i>     | 2.3   | 1.15  | 8.17E+05 | 5.23E+05 | 1.5621844 |
| P10126 | Elongation factor 1-alpha 1                                 | <i>Eef1a1</i>    | 15.35 | 12.75 | 2.10E+09 | 1.33E+09 | 1.5719376 |
| Q5SXR6 | Clathrin heavy chain;Clathrin heavy chain 1                 | <i>Cltc</i>      | 10.55 | 10.15 | 6.69E+07 | 4.26E+07 | 1.5719838 |
| Q9CQI6 | Coactosin-like protein                                      | <i>Coll1</i>     | 14.45 | 16.55 | 1.03E+08 | 6.50E+07 | 1.5812476 |
| Q6P1J1 | Dihydropyrimidinase-related protein 1                       | <i>Cmp1</i>      | 6.15  | 6.15  | 5.37E+06 | 3.38E+06 | 1.5860785 |
| B2M1R7 | Poly(rC)-binding protein 2                                  | <i>Pcbp2</i>     | 14.25 | 13.85 | 1.76E+07 | 1.11E+07 | 1.5870965 |
| Q9DCD0 | 6-phosphogluconate dehydrogenase, decarboxylating           | <i>Pgd</i>       | 5.8   | 5.8   | 1.23E+07 | 7.69E+06 | 1.6018917 |
| Q8BHZ0 | Protein FAM49A                                              | <i>Fam49a</i>    | 8.5   | 6.5   | 7.84E+05 | 4.87E+05 | 1.6099238 |
| P35585 | AP-1 complex subunit mu-1                                   | <i>Ap1m1</i>     | 5.8   | 4.05  | 1.90E+06 | 1.17E+06 | 1.627294  |
| Q61171 | Peroxioredoxin-2                                            | <i>Prdx2</i>     | 25    | 25    | 5.06E+08 | 3.10E+08 | 1.6326191 |
| F6ZBL2 | E3 ubiquitin-protein ligase MIB1                            | <i>Mib1</i>      | 2.5   | 2.5   | 1.95E+09 | 1.18E+09 | 1.6437232 |
| Q3U3V1 | Coagulation factor X                                        | <i>F10</i>       | 1.8   | 1.8   | 3.78E+06 | 2.28E+06 | 1.6583261 |
| Q8BTU6 | Eukaryotic initiation factor 4A-II                          | <i>Eif4a2</i>    | 24.2  | 21.65 | 9.47E+06 | 5.57E+06 | 1.6980858 |
| P43277 | Histone H1.3                                                | <i>Hist1h1d</i>  | 18.55 | 18.55 | 2.84E+08 | 1.67E+08 | 1.6982031 |
| Q91WU0 | Carboxylic ester hydrolase                                  | <i>Ces1f</i>     | 2.1   | 2.1   | 6.60E+07 | 3.84E+07 | 1.7195086 |
| E0CZ27 | Histone H3                                                  | <i>H3f3a</i>     | 15.55 | 19.3  | 5.70E+08 | 3.30E+08 | 1.7248706 |
| E9Q6B6 | C-Jun-amino-terminal kinase-interacting protein 3           | <i>Mapk8ip3</i>  | 1.4   | 1.4   | 3.23E+07 | 1.86E+07 | 1.7333405 |
| Q8BIZ0 | Protocadherin-20                                            | <i>Pcdh20</i>    | 0.7   | 0.7   | 6.59E+05 | 3.79E+05 | 1.7368837 |
| P29788 | Vitronectin                                                 | <i>Vtn</i>       | 3.8   | 3.8   | 2.38E+06 | 1.35E+06 | 1.7573225 |
| Q9CQV8 | 14-3-3 protein beta/alpha                                   | <i>Ywhab</i>     | 20.9  | 23.15 | 4.20E+07 | 2.38E+07 | 1.7635641 |
| P17897 | Lysozyme C-1                                                | <i>Lyz1</i>      | 8.1   | 8.1   | 3.90E+06 | 2.19E+06 | 1.7755069 |
| P97333 | Neuropilin-1                                                | <i>Nrp1</i>      | 2.3   | 3.1   | 3.55E+06 | 1.99E+06 | 1.7817533 |
| G3X9I4 | Aly/REF export factor 2                                     | <i>Alyref2</i>   | 5     | 5     | 1.75E+07 | 9.73E+06 | 1.8022802 |
| P63260 | Actin                                                       | <i>Actg1</i>     | 47.6  | 44.65 | 3.53E+06 | 1.94E+06 | 1.8262027 |
| P62082 | 40S ribosomal protein S7                                    | <i>Rps7</i>      | 2.1   | 2.1   | 7.19E+06 | 3.94E+06 | 1.8266545 |
| H7BX52 | Cullin-2                                                    | <i>Cul2</i>      | 17.8  | 17.8  | 5.21E+06 | 2.85E+06 | 1.8277042 |
| Q9R1P1 | Proteasome subunit beta type-3                              | <i>Psmb3</i>     | 6.8   | 3.4   | 6.64E+06 | 3.63E+06 | 1.8284916 |
| F6W8R9 | Nesprin-2                                                   | <i>Syne2</i>     | 1.1   | 0.55  | 7.38E+06 | 4.00E+06 | 1.843401  |
| Q8VEK3 | Heterogeneous nuclear ribonucleoprotein U                   | <i>Hnmpu</i>     | 4.65  | 4.65  | 5.36E+06 | 2.89E+06 | 1.8557495 |
| A2A813 | Protein deglycase DJ-1                                      | <i>Park7</i>     | 9.1   | 7.7   | 7.71E+06 | 4.15E+06 | 1.8572581 |
| G3UZR0 | N(G),N(G)-dimethylarginine dimethylaminohydrolase 2         | <i>Ddah2</i>     | 16.55 | 19.7  | 3.48E+06 | 1.87E+06 | 1.8595037 |
| P2604  | Moesin                                                      | <i>Msn</i>       | 4.75  | 4.75  | 3.57E+06 | 1.91E+06 | 1.8641588 |
| Q9JMG7 | Hepatoma-derived growth factor-related protein 3            | <i>Hdgfrp3</i>   | 8.2   | 8.2   | 2.53E+06 | 1.34E+06 | 1.8807877 |
| D3Z7E6 | Platelet-activating factor acetylhydrolase IB subunit gamma | <i>Pafah1b3</i>  | 13.9  | 16.4  | 8.71E+06 | 4.61E+06 | 1.8873094 |
| Q5SW88 | Ras-related protein Rab-1A                                  | <i>Rab1</i>      | 8.9   | 12.4  | 1.80E+07 | 9.38E+06 | 1.9214568 |
| Q61233 | Plastin-2                                                   | <i>Lcp1</i>      | 9     | 6.45  | 1.52E+07 | 7.75E+06 | 1.9644182 |
| D3Z315 | Coatamer subunit epsilon                                    | <i>Cope</i>      | 7.3   | 9.9   | 1.54E+06 | 7.76E+05 | 1.9872323 |
| P26645 | Myristoylated alanine-rich C-kinase substrate               | <i>Marcks</i>    | 16.2  | 8.1   | 5.31E+06 | 2.52E+06 | 2.1103271 |
| Q62084 | Protein phosphatase 1 regulatory subunit 14B                | <i>Ppp1r14b</i>  | 17    | 17.35 | 8.34E+06 | 3.89E+06 | 2.1448012 |
| G3UY42 | Polyadenylate-binding protein 2                             | <i>Pabpn1</i>    | 8.5   | 8.5   | 2.45E+06 | 1.12E+06 | 2.1813408 |
| B7FAV1 | Filamin-A                                                   | <i>Flna</i>      | 1     | 0.3   | 2.64E+06 | 1.19E+06 | 2.217373  |
| Q9CQI3 | Glia maturation factor beta                                 | <i>Gmfb</i>      | 14.6  | 14.6  | 1.14E+07 | 5.01E+06 | 2.267461  |
| H7BXC3 | Triosephosphate isomerase                                   | <i>Tpi1</i>      | 12.9  | 12.6  | 4.71E+06 | 2.07E+06 | 2.2687512 |
| Q60865 | Caprin-1                                                    | <i>Caprin1</i>   | 3.3   | 3.3   | 2.74E+07 | 1.20E+07 | 2.2891093 |
| F6Q2E3 | 26S protease regulatory subunit 6A                          | <i>Psmc3</i>     | 7.9   | 3.95  | 6.35E+05 | 2.72E+05 | 2.3318521 |
| F6VR16 | Ubiquitin-like modifier-activating enzyme 5                 | <i>Uba5</i>      | 16.2  | 8.1   | 5.56E+05 | 2.33E+05 | 2.383202  |
| P60867 | 40S ribosomal protein S20                                   | <i>Rps20</i>     | 14.25 | 9.65  | 1.46E+07 | 6.10E+06 | 2.3875143 |
| Q14AA6 | GTP-binding nuclear protein Ran                             | <i>Ran</i>       | 9.7   | 14.8  | 5.11E+07 | 2.13E+07 | 2.3989767 |
| P68134 | Actin, alpha skeletal muscle                                | <i>Acta1</i>     | 26.4  | 23.45 | 8.55E+07 | 3.55E+07 | 2.4108667 |
| P35700 | Peroxioredoxin-1                                            | <i>Prdx1</i>     | 17.75 | 20.15 | 6.77E+07 | 2.75E+07 | 2.4657958 |
| P02089 | Hemoglobin subunit beta-2                                   | <i>Hbb-b2</i>    | 46.9  | 46.6  | 1.84E+08 | 7.40E+07 | 2.4912119 |
| Q04750 | DNA topoisomerase 1                                         | <i>Top1</i>      | 2.1   | 2.1   | 1.98E+06 | 7.37E+05 | 2.6873618 |
| Q543K9 | Purine nucleoside phosphorylase                             | <i>Pnp;Pnp2</i>  | 6.6   | 3.3   | 7.72E+05 | 2.84E+05 | 2.7204358 |
| Q8CGP4 | Histone H2A                                                 | <i>Hist1h2aa</i> | 21.4  | 21.4  | 4.88E+08 | 1.74E+08 | 2.8048444 |
| P83917 | Chromobox protein homolog 1                                 | <i>Cbx1</i>      | 9.2   | 7.55  | 1.22E+06 | 4.26E+05 | 2.8537753 |
| O35864 | COP9 signalosome complex subunit 5                          | <i>Cops5</i>     | 14.3  | 14.3  | 4.69E+06 | 1.63E+06 | 2.8804678 |
| Q9CR00 | 26S proteasome non-ATPase regulatory subunit 9              | <i>Psm9</i>      | 5.1   | 2.55  | 4.20E+06 | 1.36E+06 | 3.0804593 |
| P00015 | Cytochrome c, testis-specific                               | <i>Cyct</i>      | 24.3  | 17.65 | 1.89E+07 | 5.88E+06 | 3.2051827 |
| P28658 | Ataxin-10                                                   | <i>Atxn10</i>    | 1.45  | 1.45  | 8.12E+05 | 2.29E+05 | 3.5437179 |
| P20357 | Microtubule-associated protein 2                            | <i>Map2</i>      | 1.75  | 1.4   | 4.00E+06 | 1.13E+06 | 3.5489953 |
| P61750 | ADP-ribosylation factor 4                                   | <i>Arf4</i>      | 11.7  | 11.7  | 9.87E+06 | 2.49E+06 | 3.955426  |
| P11087 | Collagen alpha-1(I) chain                                   | <i>Col1a1</i>    | 6.15  | 3.95  | 1.68E+07 | 4.21E+06 | 3.9850303 |
| P97379 | Ras GTPase-activating protein-binding protein 2             | <i>G3bp2</i>     | 12    | 12    | 3.87E+06 | 9.04E+05 | 4.278474  |
| D3Z7K0 | Ubiquitin thioesterase OTUB1                                | <i>Otub1</i>     | 18.65 | 14.9  | 2.72E+07 | 5.13E+06 | 5.3105051 |
| P27048 | Small nuclear ribonucleoprotein-associated protein B        | <i>Snrpb</i>     | 8.25  | 3.25  | 1.68E+06 | 2.01E+05 | 8.3721104 |
| P35396 | Peroxisome proliferator-activated receptor delta            | <i>Ppard</i>     | 1.6   | 1.6   | 1.39E+08 | 1.00E+07 | 13.877689 |
| P07309 | Transthyretin                                               | <i>Ttr</i>       | 11.9  | 5.1   | 7.35E+07 | 1.55E+06 | 47.408315 |
